# Supplementary material
Source: PubMed Central journal article supplement (PMC5441424)
Supplement: PRO-26-1098-s001.pdf [file PRO-26-1098-s001.pdf]

Three Supporting Figures.

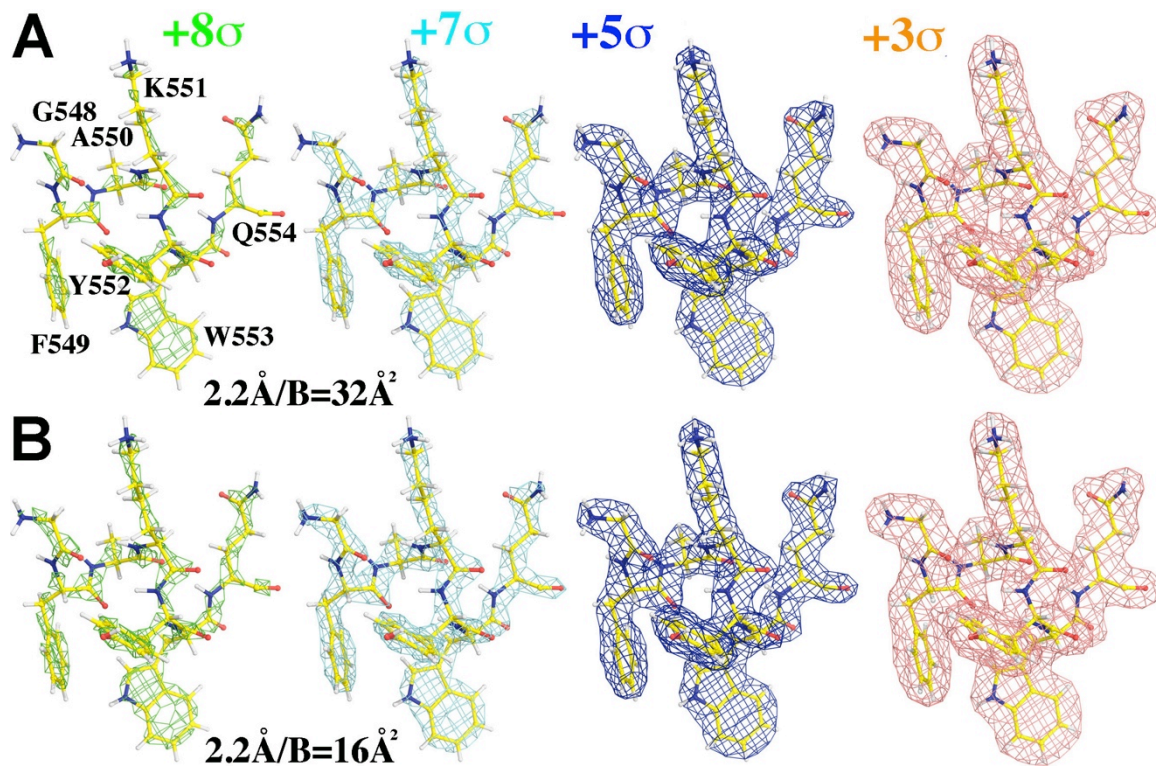

**Figure S1.** Simulated ESP map using neutral atomic models with  $B=32\text{\AA}^2$  (A) or  $B=16\text{\AA}^2$  (B) contoured at  $+8.0\sigma$  (green) as well as three contour levels used in Figure 2, namely,  $+7\sigma$  (cyan),  $+5.0\sigma$  (blue), and  $+3.0\sigma$  (salmon).

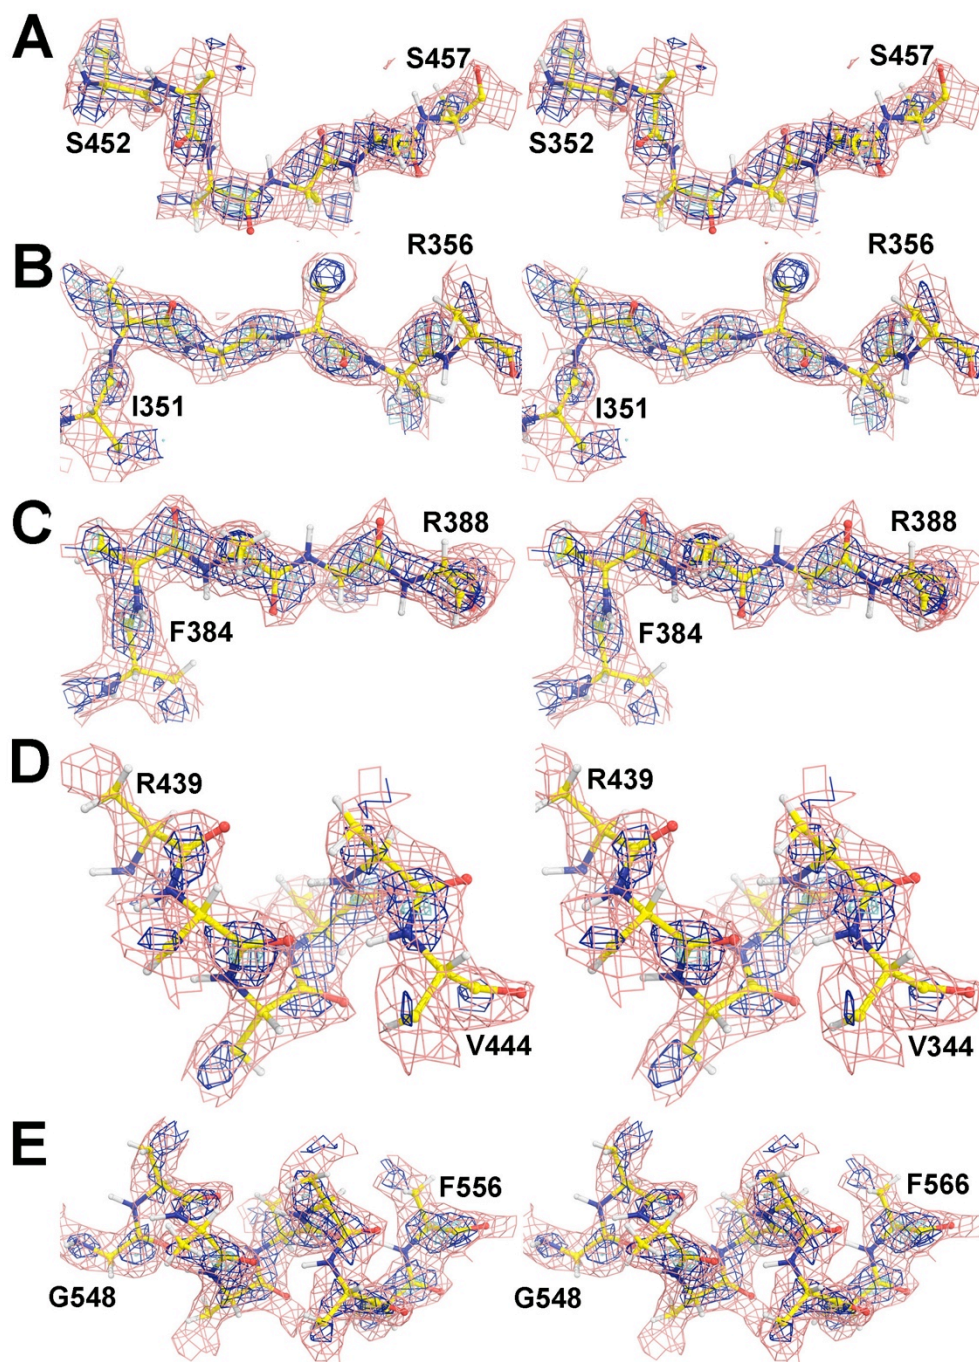

**Figure S2.** Sreodiagram continued from Figure 2 in three contour levels (+7 $\sigma$ , cyan; +5 $\sigma$ , blue, and +3 $\sigma$ , salmon)

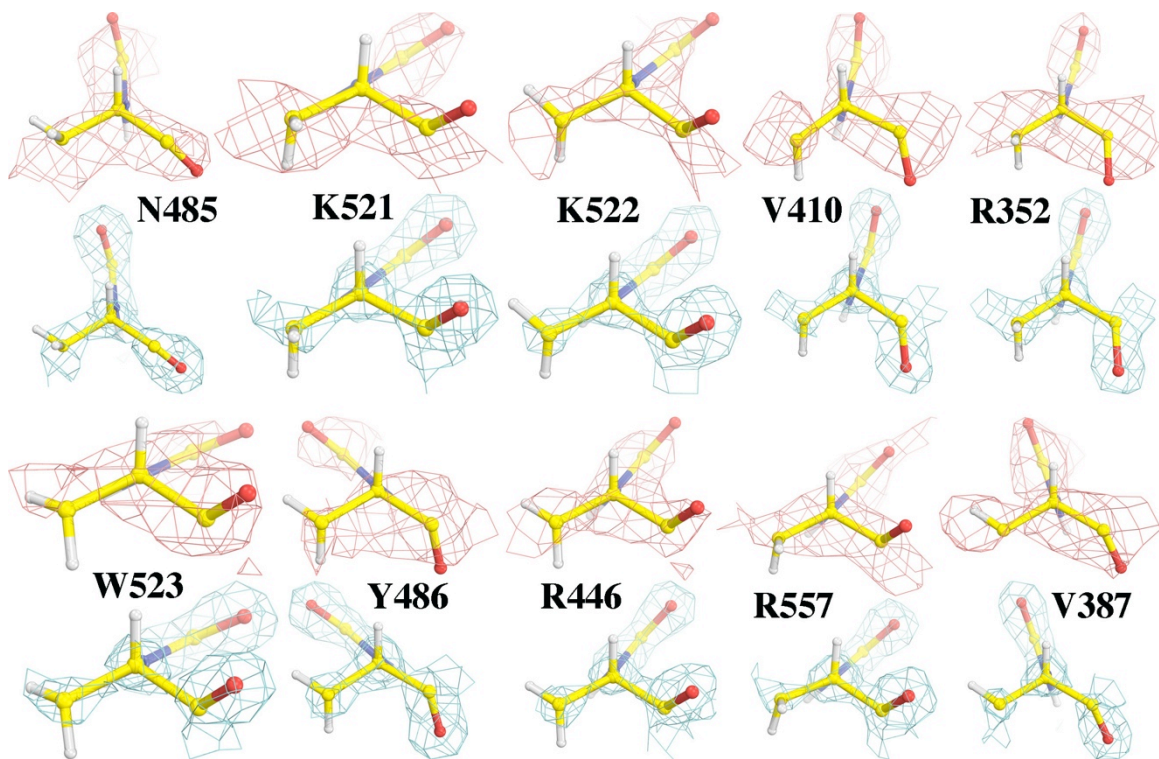

**Figure S3.** Continued from Figure 2.
